# Supplementary material for: Genomic Tools for Evolution and Conservation in the Chimpanzee: Pan troglodytes ellioti Is a Genetically Distinct Population
Source: PubMed Central journal article supplement (PMC3291532; doi:10.1371/journal.pgen.1002504), 2012-03-01

Fig S4 (b)

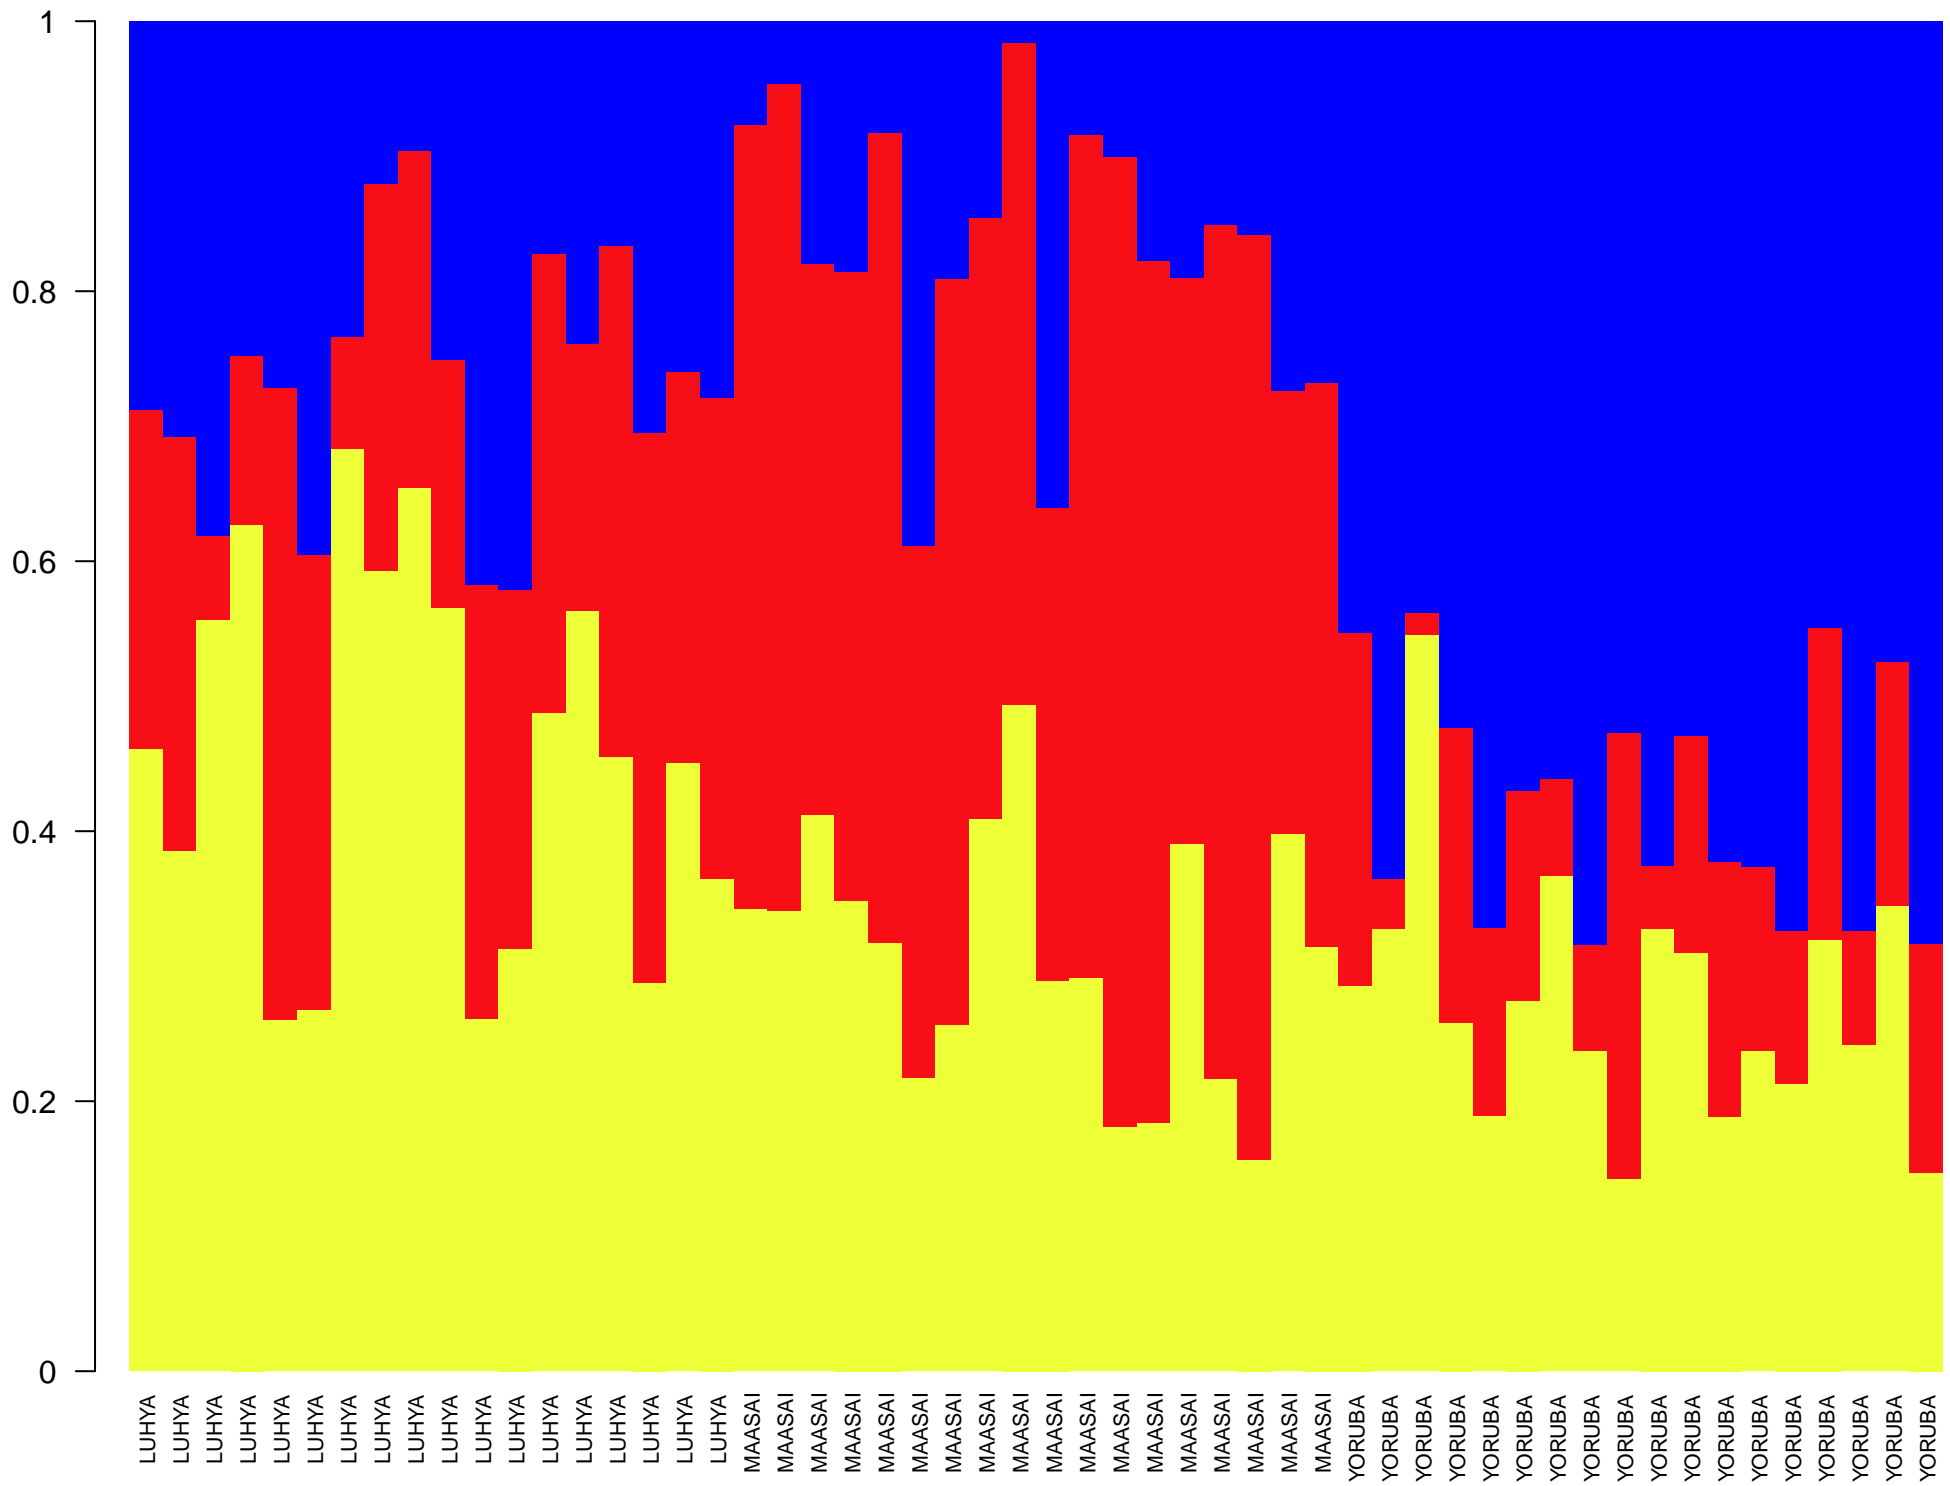

Supplement: pgen.1002504.s004.pdf [file pgen.1002504.s004.pdf]
